# Supplementary material for: Phase I study of the anti-FcRH5 antibody-drug conjugate DFRF4539A in relapsed or refractory multiple myeloma
Source: PubMed Central journal article supplement (PMC6362066; doi:10.1038/s41408-019-0178-8), 2019-02-04

## **Phase I study of the anti-FcRH5 antibody-drug conjugate DFRF4539A in relapsed or refractory multiple myeloma**

A. Keith Stewart<sup>1</sup>, Amrita Y. Krishnan<sup>2</sup>, Seema Singhal<sup>3</sup>, Ralph V. Boccia<sup>4</sup>, Manish R. Patel<sup>5,6</sup>, Ruben Niesvizky<sup>7</sup>, Asher A. Chanan-Khan<sup>8</sup>, Sikander Ailawadhi<sup>8</sup>, Jochen Brumm<sup>9</sup>, Kirsten E. Mundt<sup>9</sup>, Kyu Hong<sup>9</sup>, Jacqueline McBride<sup>9</sup>, Quyen Shon-Nguyen<sup>9</sup>, Yuanyuan Xiao<sup>9</sup>, Vanitha Ramakrishnan<sup>9</sup>, Andrew G. Polson<sup>9</sup>, Divya Samineni<sup>9</sup>, Douglas Leipold<sup>9</sup>, Eric W. Humke<sup>9</sup>, James Scott McClellan<sup>9</sup>, Jesus G. Berdeja<sup>6</sup>

<sup>1</sup>Division of Hematology-Oncology, Mayo Clinic, Phoenix, AZ

<sup>2</sup>Judy and Bernard Briskin Center for Multiple Myeloma Research, City of Hope Medical Center, Duarte, CA

<sup>3</sup>Lurie Comprehensive Cancer Center, Northwestern University, Chicago, IL

<sup>4</sup>Center for Cancer and Blood Disorders, Bethesda, MD

<sup>5</sup>Florida Cancer Specialists, Sarasota, FL

<sup>6</sup>Sarah Cannon Research Institute, Nashville, TN

<sup>7</sup>Multiple Myeloma Center, New York Presbyterian Hospital-Cornell Medical Center, New York, NY

<sup>8</sup>Division of Hematology & Oncology, Mayo Clinic, Jacksonville, FL

<sup>9</sup>Genentech, Inc., South San Francisco, CA

### **Corresponding author:**

A. Keith Stewart, M.B., Ch.B.  
Division of Hematology-Oncology  
Mayo Clinic Arizona  
13400 E. Shea Blvd.  
Scottsdale, AZ 85259  
[Stewart.Keith@mayo.edu](mailto:Stewart.Keith@mayo.edu)

**SUPPLEMENTARY INFORMATION**

**Supplementary Table S1.** Adverse events related to DFRF4539A occurring in  $\geq 10\%$  of patients

|                               | Q3W Dosing      |                 |                 |                 |                  | Q1W Dosing      |                 | All Patients (N=39) |
|-------------------------------|-----------------|-----------------|-----------------|-----------------|------------------|-----------------|-----------------|---------------------|
|                               | 0.3 mg/kg (n=3) | 0.6 mg/kg (n=3) | 1.2 mg/kg (n=3) | 1.8 mg/kg (n=7) | 2.4 mg/kg (n=17) | 0.8 mg/kg (n=3) | 1.1 mg/kg (n=3) |                     |
| Any AE                        | 3 (100%)        | 1 (33%)         | 3 (100%)        | 6 (86%)         | 13 (77%)         | 2 (67%)         | 2 (67%)         | 30 (77%)            |
| Anemia                        | 3 (100%)        | 0               | 0               | 1 (14%)         | 4 (24%)          | 1 (33%)         | 1 (33%)         | 10 (26%)            |
| Fatigue                       | 1 (33%)         | 0               | 0               | 0               | 7 (41%)          | 0               | 0               | 8 (21%)             |
| Nausea                        | 0               | 1 (33%)         | 1 (33%)         | 0               | 4 (24%)          | 0               | 1 (33%)         | 7 (18%)             |
| Increased AST                 | 0               | 0               | 1 (33%)         | 1 (14%)         | 3 (17%)          | 1 (33%)         | 0               | 6 (15%)             |
| Neutropenia                   | 2 (67%)         | 0               | 0               | 0               | 3 (17%)          | 1 (33%)         | 0               | 6 (15%)             |
| Diarrhea                      | 0               | 0               | 1 (33%)         | 0               | 4 (24%)          |                 | 0               | 5 (13%)             |
| Peripheral neuropathy         | 0               | 0               | 0               | 1 (14%)         | 2 (12%)          | 1 (33%)         | 0               | 4 (10%)             |
| Peripheral sensory neuropathy | 0               | 0               | 0               | 2 (28%)         | 2 (12%)          | 0               | 0               | 4 (10%)             |
| Thrombocytopenia              | 1 (33%)         | 0               | 0               | 1 (14%)         | 2 (12%)          | 0               | 0               | 4 (10%)             |



**Supplementary Figure S1. Study scheme.**

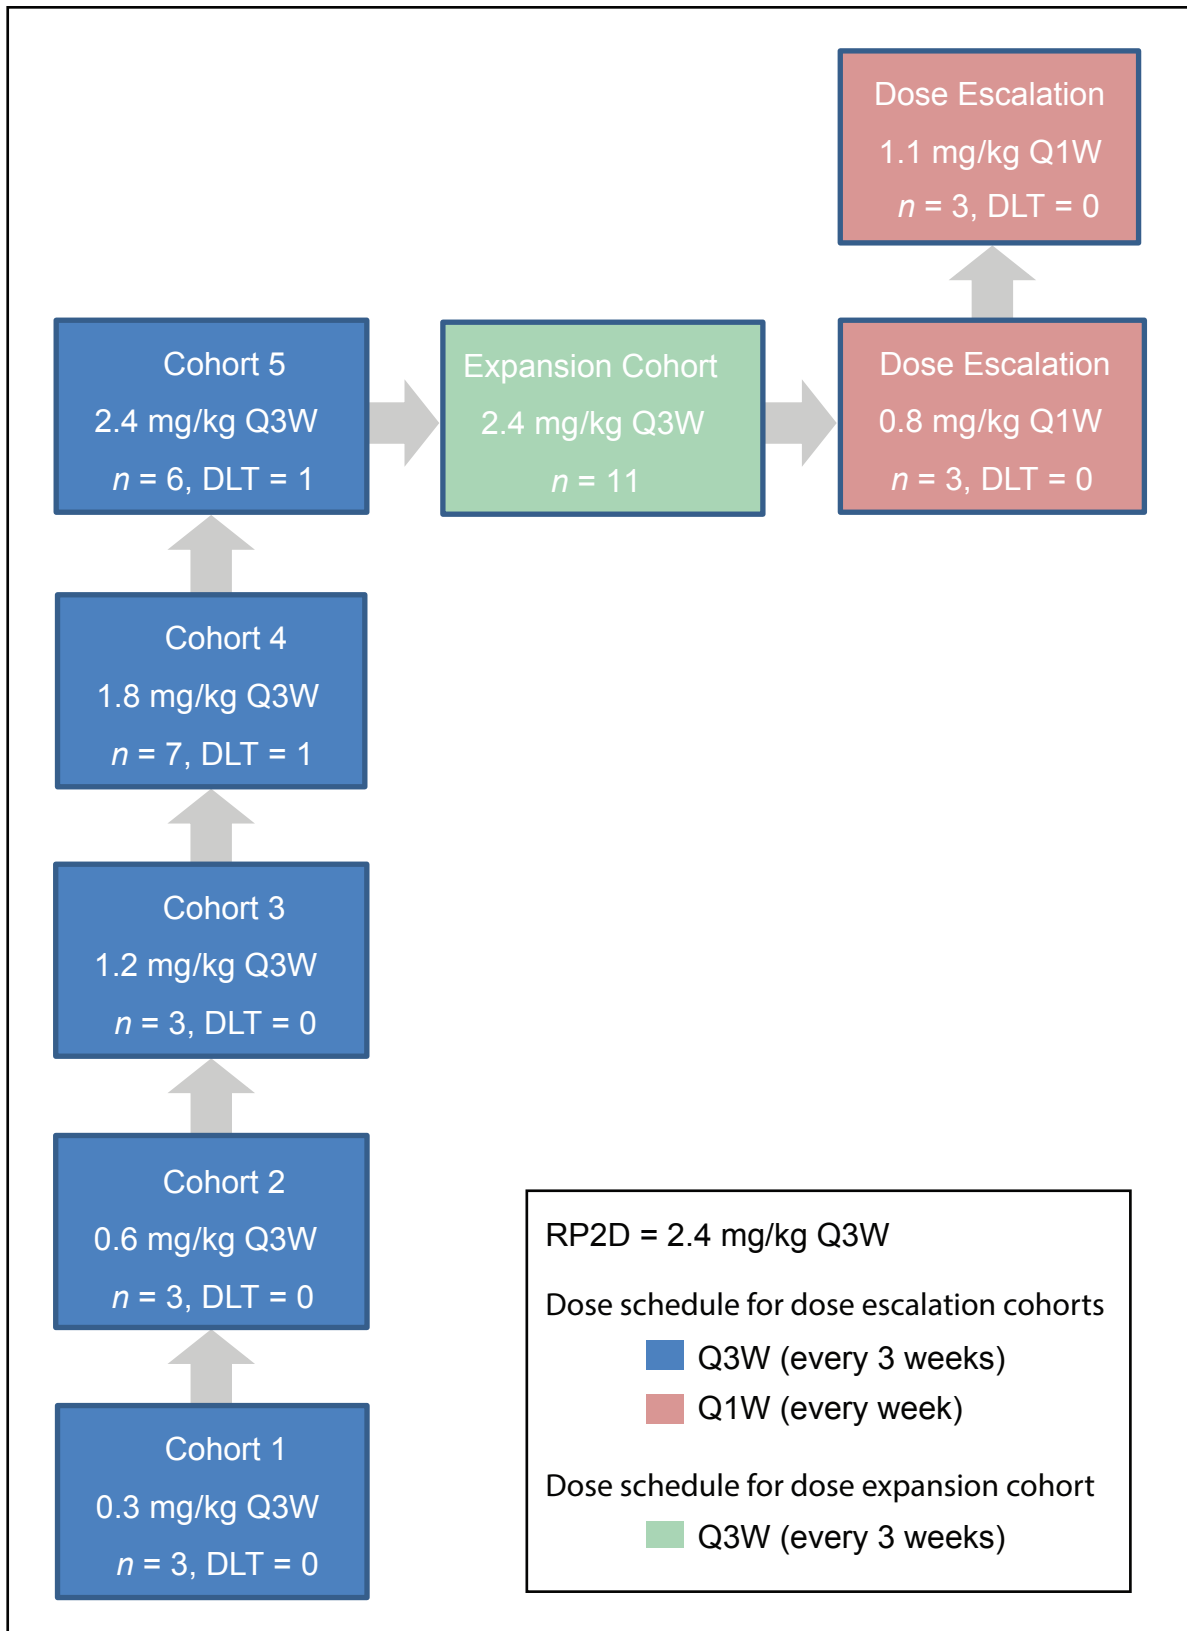

**Supplementary Figure S2.** Time on study for Q3W cohorts.

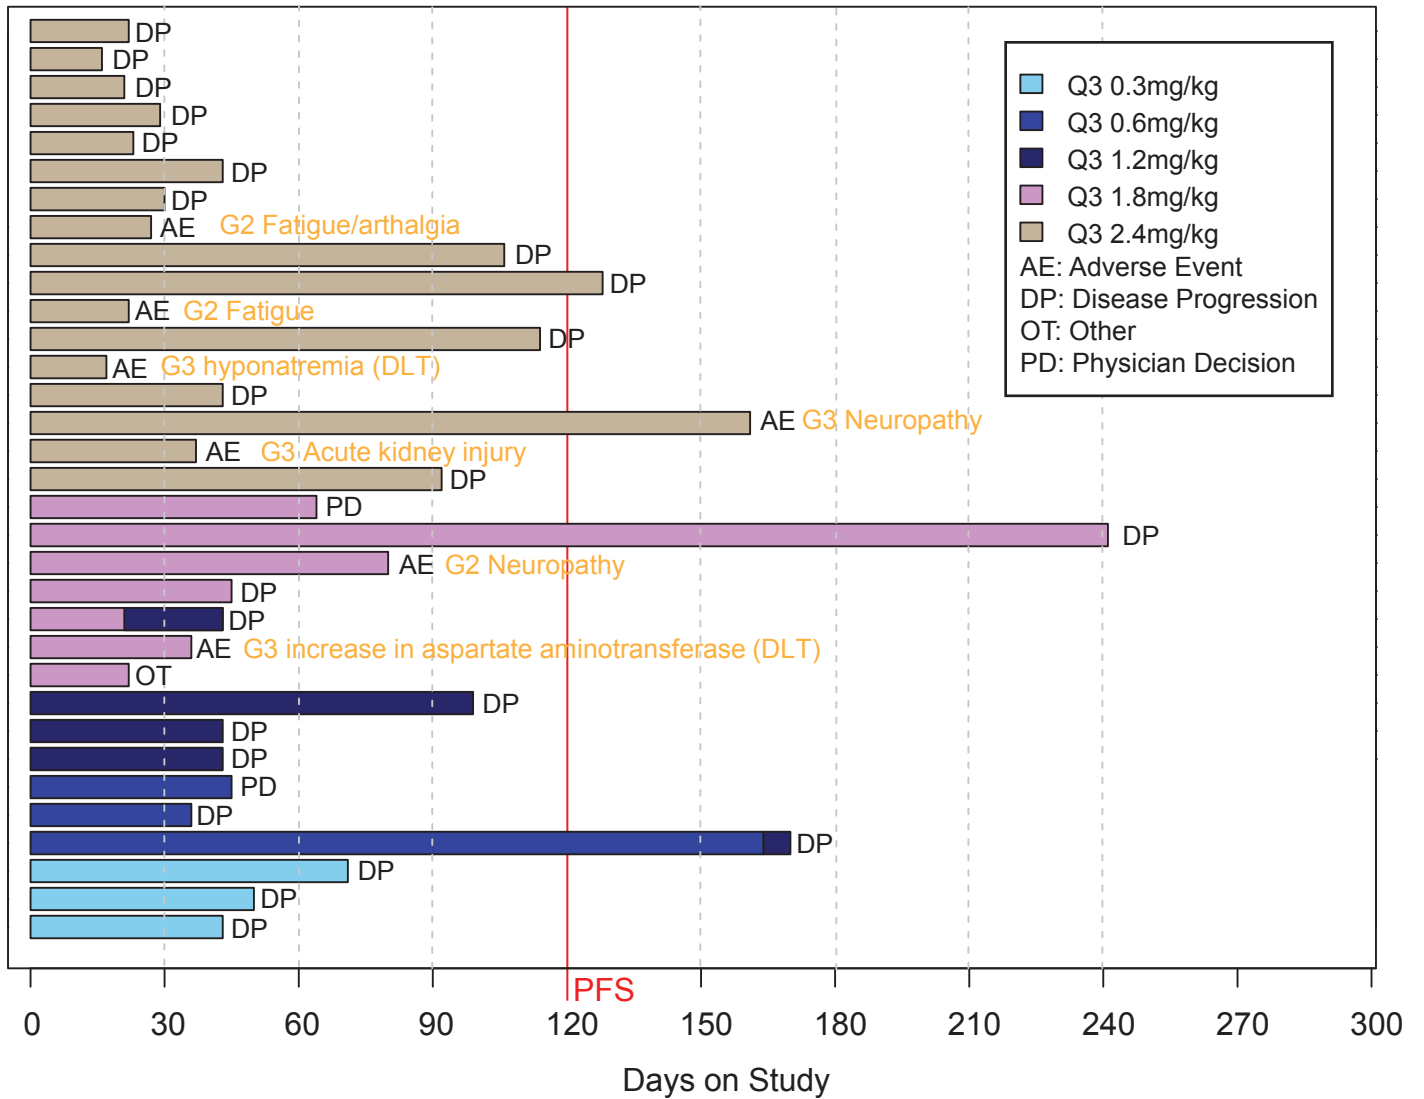

**Supplementary Figure S3.** Time to first onset of peripheral neuropathy in safety evaluable patients, 2.4 mg/kg, every 3 weeks dosing. Peripheral neuropathy using standardized MedDRA queries (SMQs) MedDRA v17.0.

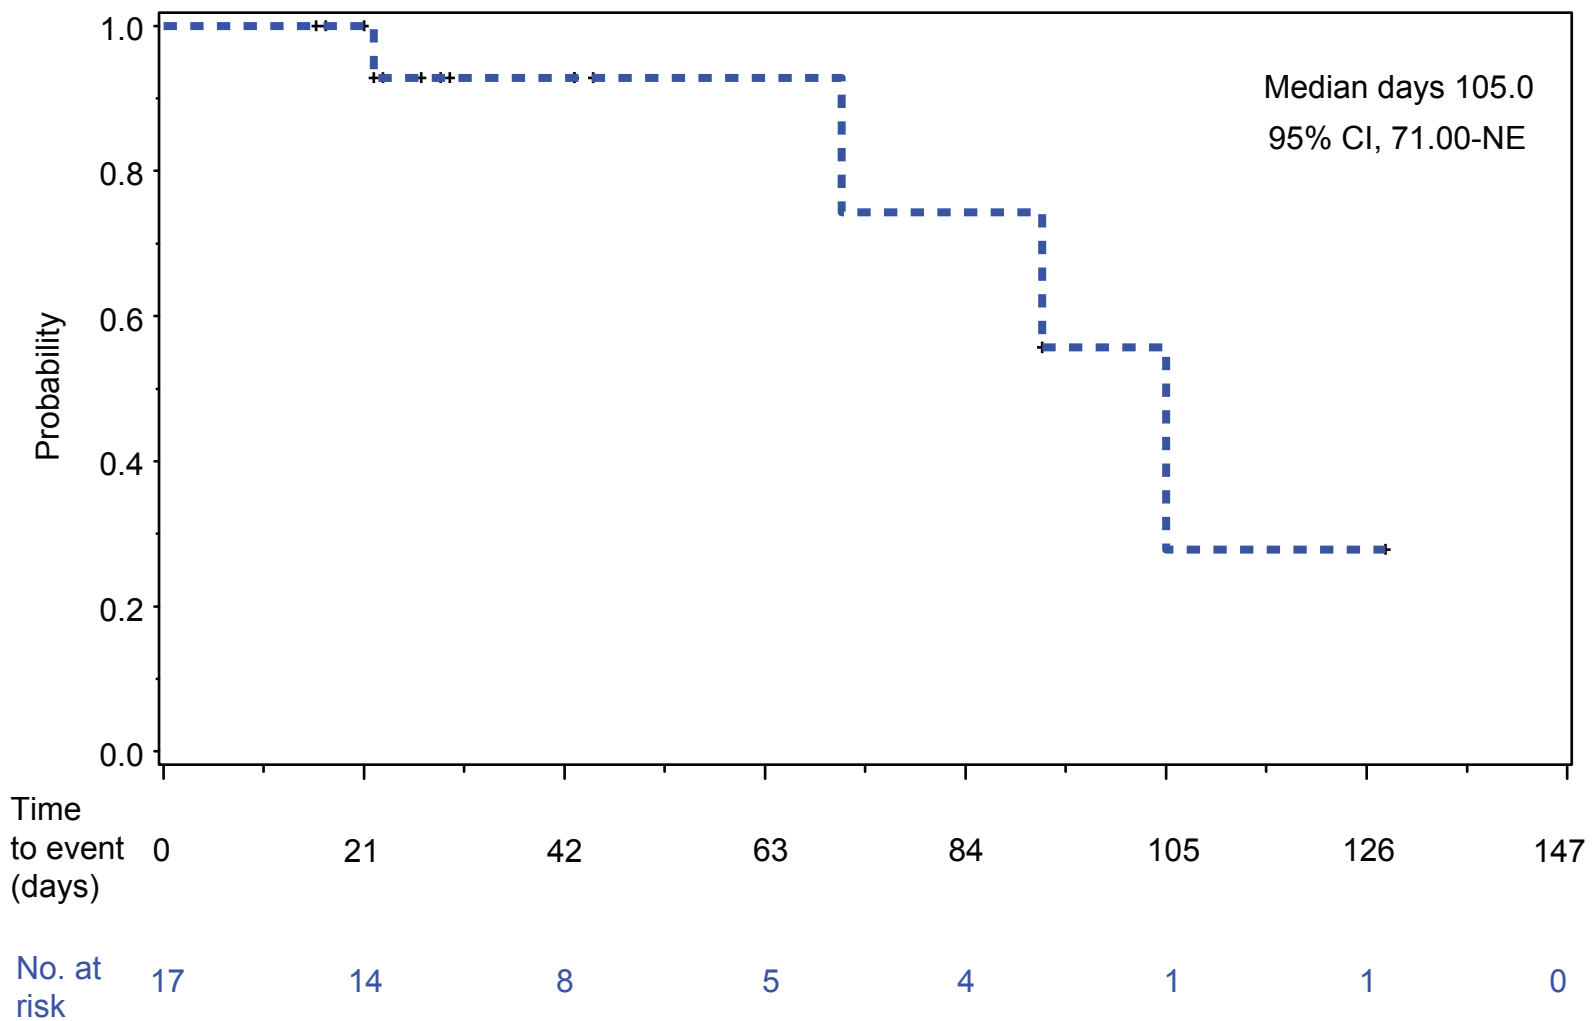

Supplement: 41408_2019_178_MOESM1_ESM.pdf [file 41408_2019_178_MOESM1_ESM.pdf]
